# Supplementary material for: Clinical application of oscillometry in respiratory diseases: an impulse oscillometry registry
Source: PubMed Central journal article supplement — ERJ Open Res. 2022 Oct 17;8(4):00080-2022. doi: 10.1183/23120541.00080-2022 (PMC9574560; doi:10.1183/23120541.00080-2022), 2022-10-17
Supplement: 00080-2022.SUPPLEMENT.pdf [file 00080-2022.SUPPLEMENT.pdf]

# Supplementary materials

## Methods

### Study participants

Patients were excluded with the following criteria: 1) the diagnosis was not supported by the relevant medical records; 2) combined other respiratory diseases (except for UAO combined lung tumour); 3) combined severe cardiovascular diseases or systematic diseases.

### Procedures

Through a case report form, physicians or technicians at the laboratory recorded the basic demographics; smoking history; allergies; occupational exposures history; comorbidities; respiratory symptoms; exacerbations; medications, and examinations (chest radiography, electrocardiography, echocardiography, bronchoscopy, or histopathological examination) of the participants. COPD patients and asthmatic patients were required to respectively fulfil the modified Medical Research Council (mMRC) [1] dyspnoea grade as well as the COPD Assessment Test (CAT) [2], and the Asthma Control Test (ACT) [3].

## Results

Figure S1 Scatter plots between z-scores of oscillometric parameters and FEV<sub>1</sub> z-score

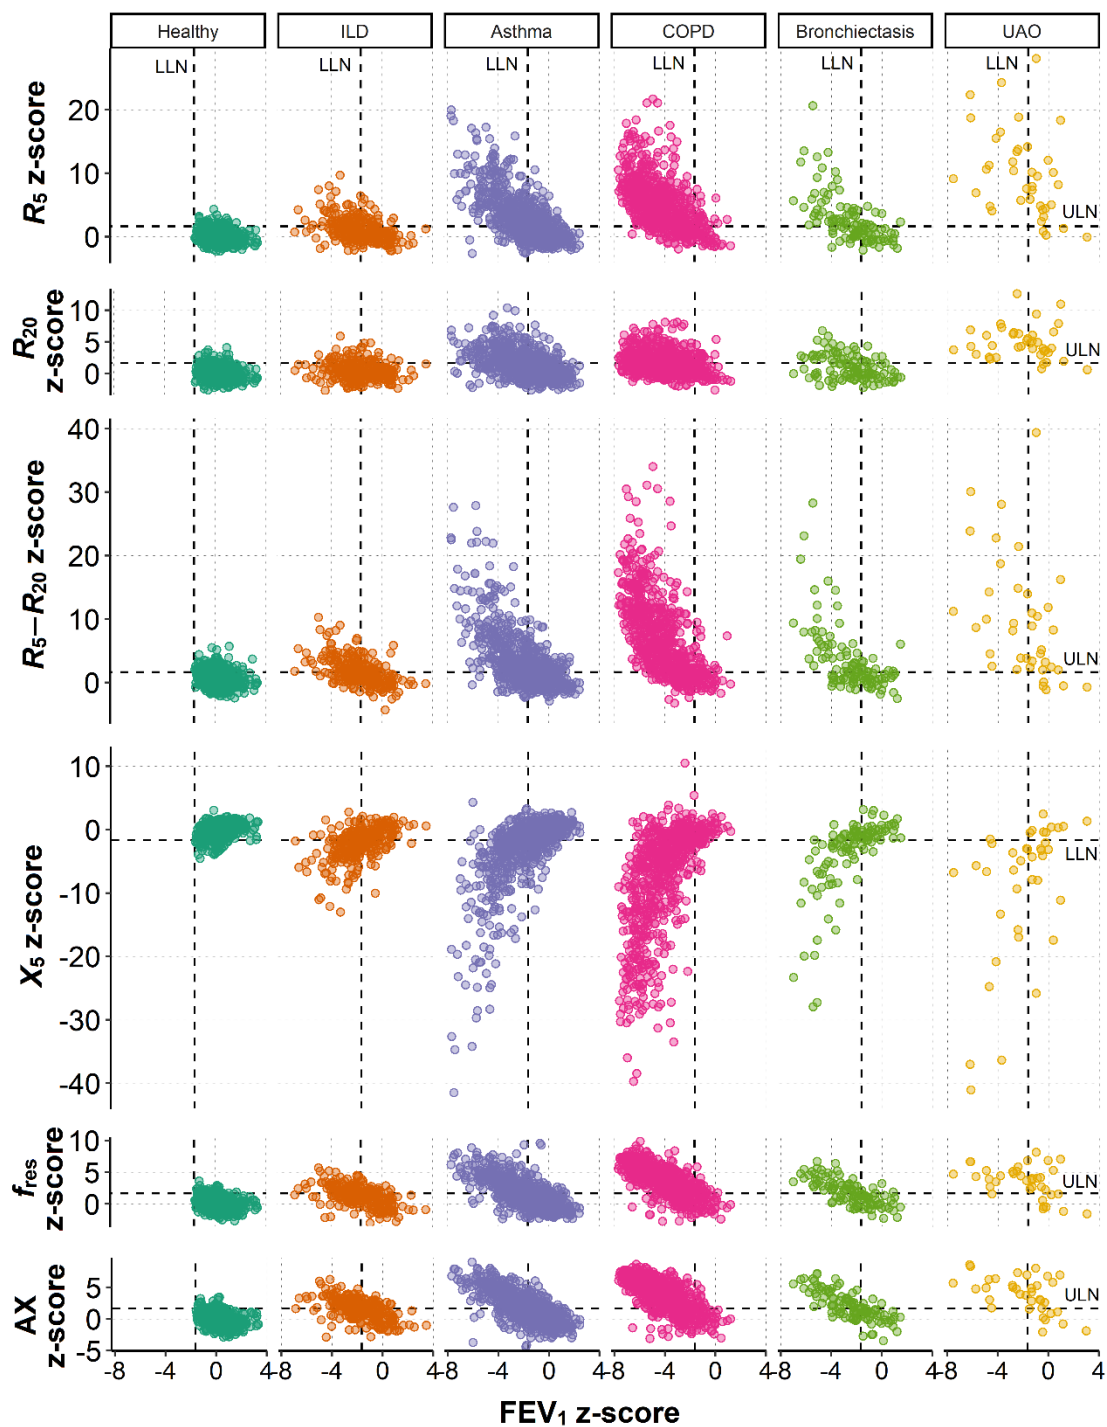

ULN: upper limits of normal=1.645. LLN: lower limits of normal=-1.645.

**Figure S2** Correlation between the oscillometric parameters and spirometry parameters

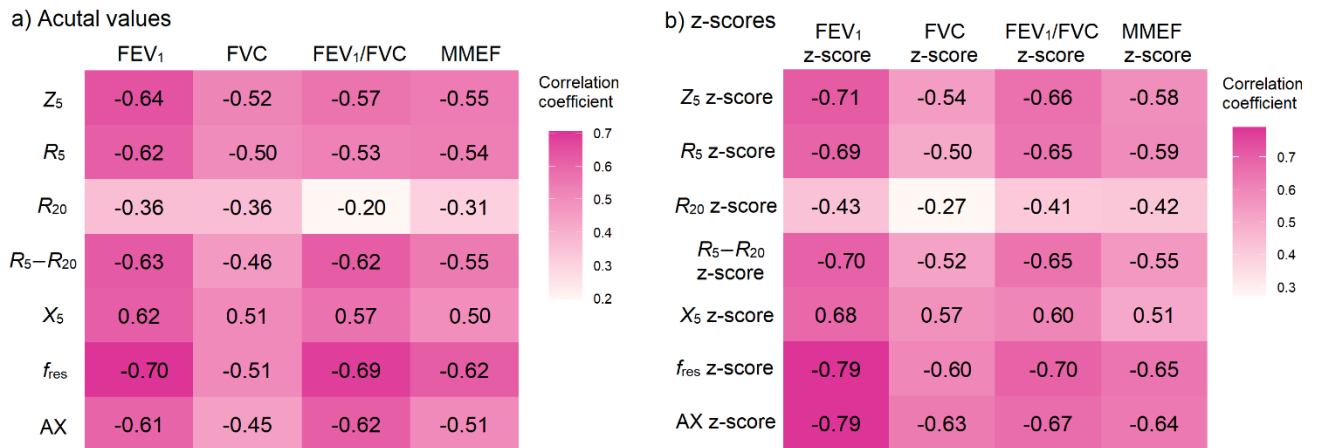

The correlation coefficients were derived from the Spearman correlation analysis, *P* all <0.05.

**Figure S3** The best oscillometric parameters in diagnosing each respiratory disease

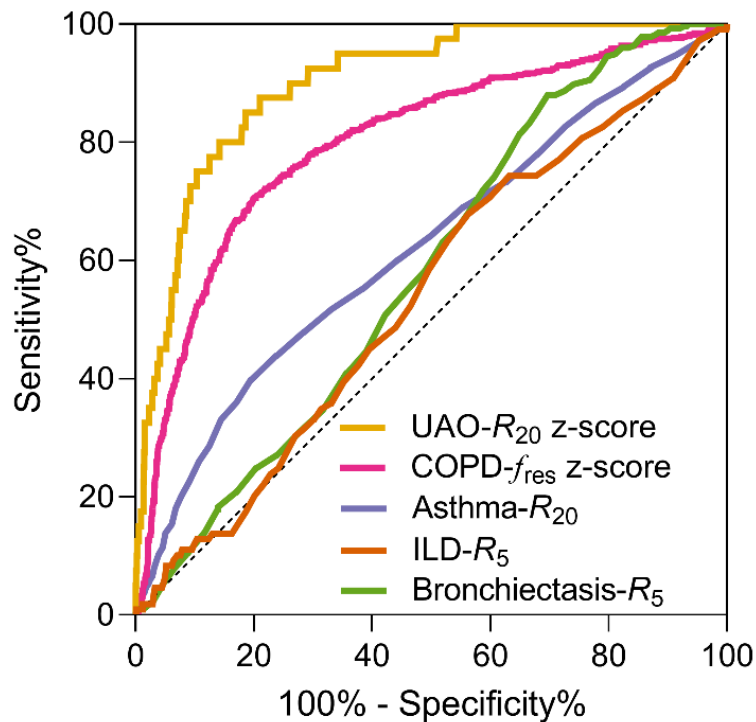

**Figure S4** Comparisons of the diagnostic performances between  $R_{20}$  and spirometric parameters in identifying upper airway obstruction.

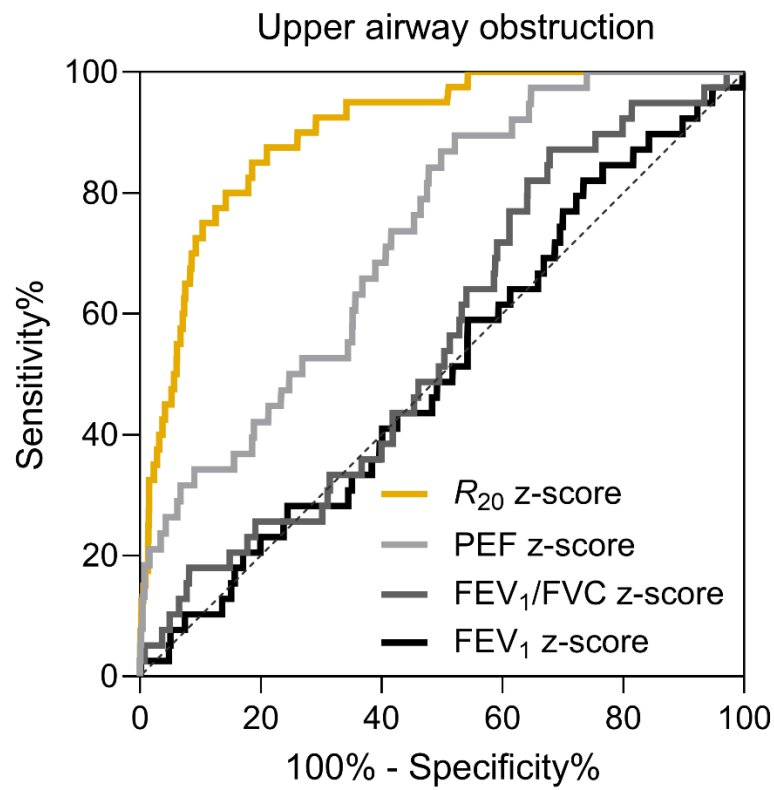

**Table S1** Diagnostic values of the best oscillometric parameters in diagnosing specific respiratory disease

|                | Variable          | AUC (95% CI)         | <i>P</i> | Cut-off      | Sensitivity | Specificity |
|----------------|-------------------|----------------------|----------|--------------|-------------|-------------|
| UAO            | $R_{20}$ z-score  | 0.895 (0.852, 0.938) | <0.01    | >2.300       | 87.5        | 79.0        |
| COPD           | $f_{res}$ z-score | 0.807 (0.789, 0.826) | <0.01    | >2.590       | 70.6        | 50.7        |
| Asthma         | $R_{20}$          | 0.620 (0.596, 0.645) | <0.01    | >0.346       | 39.7        | 80.6        |
| ILD            | $R_5$             | 0.580 (0.549, 0.612) | <0.01    | $\leq$ 0.450 | 88.0        | 30.4        |
| Bronchiectasis | $R_5$             | 0.536 (0.482, 0.590) | 0.148    | >0.335       | 67.9        | 43.7        |

AUC: area under the curve; 95%CI: 95% confidential interval.

## References:

1. Bestall JC, Paul EA, Garrod R, Garnham R, Jones PW, Wedzicha JA. Usefulness of the Medical Research Council (MRC) dyspnoea scale as a measure of disability in patients with chronic obstructive pulmonary disease. *Thorax* 1999; 54: 581–586.
2. Jones PW, Harding G, Berry P, Wiklund I, Chen WH, Kline Leidy N. Development and first validation of the COPD Assessment Test. *Eur. Respir. J.* 2009; 34: 648–654.
3. Nathan RA, Sorkness CA, Kosinski M, Schatz M, Li JT, Marcus P, Murray JJ, Pendergraft TB. Development of the Asthma Control Test: A survey for assessing asthma control. *J. Allergy Clin. Immunol.* 2004; 113: 59–65.
